# Supplementary material for: Uncovering Novel Capsaicin Inhibitory Activity towards Human Carbonic Anhydrase Isoforms IX and XII by Combining In Silico and In Vitro Studies
Source: MDPI journal article supplement (doi:10.3390/antiox12051115), 2023-05-18
Supplement: s1 [file s1]

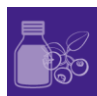

## Supplementary Material

# Uncovering Novel Capsaicin Inhibitory Activity towards Human Carbonic Anhydrase Isoforms IX and XII by Combining In Silico and In Vitro Studies

Gianmarco Gualtieri <sup>1,2</sup>, Annalisa Maruca <sup>3</sup>, Roberta Rocca <sup>2,3,4,\*</sup>, Fabrizio Carta <sup>5</sup>, Emanuela Berrino <sup>5</sup>, Alessandro Salatino <sup>1</sup>, Carolina Brescia <sup>1</sup>, Roberta Torcasio <sup>4,6</sup>, Manuel Crispo <sup>4</sup>, Francesco Trapasso <sup>4</sup>, Stefano Alcaro <sup>1,2,3</sup>, Claudiu T. Supuran <sup>5</sup> and Giosuè Costa <sup>1,3</sup>

<sup>1</sup> Dipartimento di Scienze della Salute, Università “Magna Græcia” di Catanzaro, Viale Europa, 88100 Catanzaro, Italy; g.gualtieri@unicz.it (G.G.); salatino@unicz.it (A.S.); brescia@unicz.it (C.B.); alcaro@unicz.it (S.A.); gcosta@unicz.it (G.C.)

<sup>2</sup> Associazione CRISEA—Centro di Ricerca e Servizi Avanzati per l’Innovazione Rurale, Località Condoleo di Belcastro, 88055 Catanzaro, Italy

<sup>3</sup> Net4Science Srl, Università “Magna Græcia” di Catanzaro, Viale Europa, 88100 Catanzaro, Italy; maruca@unicz.it

<sup>4</sup> Dipartimento di Medicina Clinica e Sperimentale, Università “Magna Græcia” di Catanzaro, Viale Europa, 88100 Catanzaro, Italy; roberta.torcasio@studenti.unicz.it (R.T.); manuelcrispo5@gmail.com (M.C.); trapasso@unicz.it (F.T.)

<sup>5</sup> Dipartimento Neurofarba, Sezione di Scienze Farmaceutiche e Nutraceutiche, Università degli Studi di Firenze, Sesto Fiorentino, 50019 Florence, Italy; fabrizio.carta@unifi.it (F.C.); emanuela.berrino@uniroma1.it (E.B.); claudiu.supuran@unifi.it (C.T.S.)

<sup>6</sup> Dipartimento di Biologia, Ecologia e Scienza della Terra (DIBEST), Università della Calabria, Arcavacata di Rende, 87036 Cosenza, Italy

\* Correspondence: rocca@unicz.it; Tel.: +39-0961-369-4198

## Table of Contents

**Table S1.** 2D structures and binding free energy values ( $\Delta G_{\text{bind}}$ ) for each already approved inhibitor of both *hCA* IX and XII isoform. Also, average  $\Delta G_{\text{bind}}$  values for both isoforms are shown. All reported values are expressed in Kcal/mol.

### Thermodynamic analysis

**Table S2.** Values of  $\Delta G_{\text{bind}}$  energy components ( $\Delta G_{\text{coul}}$ ,  $\Delta G_{\text{lip}}$ ,  $\Delta G_{\text{solvGB}}$ ,  $\Delta G_{\text{vdW}}$ ) for the complexes of *hCA* IX and *hCA* XII with Capsaicin. The reported values are expressed in Kcal/mol.

**Table S3.** Values of the  $\Delta G_{\text{bind}}$  energy components ( $\Delta G_{\text{coul}}$ ,  $\Delta G_{\text{lip}}$ ,  $\Delta G_{\text{solvGB}}$ ,  $\Delta G_{\text{vdW}}$ ) related to the complexes of *hCA* IX and *hCA* XII with the known active compounds. The reported values are expressed in Kcal/mol.

**Figure S1.** Trend of the RMSD value calculated on the C $\alpha$  of **A)** *hCA* IX and **B)** *hCA* XII, in the *apo* form (black line) and in complex with the capsaicin (red line). The RMSD values are reported in Å.

**Figure S2.** RMSD trend of capsaicin complexed with **A)** the *hCA* IX and **B)** the *hCA* XII, during MDs. The RMSD values, reported in Å, are calculated on the heavy atoms of the ligand after the superimposition on the protein.

**Table S1.** 2D structures and binding free energy values ( $\Delta G_{\text{bind}}$ ) for each already approved inhibitor of both *hCA* IX and XII isoform. Also, average  $\Delta G_{\text{bind}}$  values for both isoforms are shown. All reported values are expressed in Kcal/mol.

| Compound                                    | 2D structure                                                                        | <i>hCA</i> IX                          | <i>hCA</i> XII                         |
|---------------------------------------------|-------------------------------------------------------------------------------------|----------------------------------------|----------------------------------------|
|                                             |                                                                                     | $\Delta G_{\text{bind}}$<br>(Kcal/mol) | $\Delta G_{\text{bind}}$<br>(Kcal/mol) |
| Benzthiazide                                | 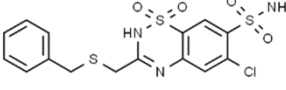   | -79.85                                 | -71.78                                 |
| Ellagic acid                                |    | -55.96                                 | -73.50                                 |
| Zonisamide                                  |    | -44.01                                 | -43.28                                 |
| Hydroflumethiazide                          |   | -42.83                                 | -61.74                                 |
| Acetazolamide                               |  | /                                      | -43.76                                 |
| Average $\Delta G_{\text{bind}}$ (Kcal/mol) |                                                                                     | -55.66                                 | -58.81                                 |

### Thermodynamic analysis

To better investigate the affinity of capsaicin towards *hCA* IX and XII, we performed  $\Delta G_{\text{bind}}$  energy component analysis, taking into account the active set (Table S2 and Table S3).

**Table S2.** Values of  $\Delta G_{\text{bind}}$  energy components ( $\Delta G_{\text{Coul}}$ ,  $\Delta G_{\text{lip}}$ ,  $\Delta G_{\text{solvGB}}$ ,  $\Delta G_{\text{vdW}}$ ) for the complexes of *hCA* IX and *hCA* XII with Capsaicin. The reported values are expressed in Kcal/mol.

|                |                | $\Delta G_{\text{Coul}}$<br>(Kcal/mol) | $\Delta G_{\text{lip}}$<br>(Kcal/mol) | $\Delta G_{\text{solvGB}}$<br>(Kcal/mol) | $\Delta G_{\text{vdW}}$<br>(Kcal/mol) |
|----------------|----------------|----------------------------------------|---------------------------------------|------------------------------------------|---------------------------------------|
| <i>hCA</i> IX  | Binding mode 1 | -34.62                                 | -51.65                                | 22.12                                    | -41.02                                |
|                | Binding mode 2 | -19.31                                 | -67.63                                | 32.78                                    | -51.92                                |
|                | Binding mode 3 | -24.35                                 | -54.98                                | 27.61                                    | -48.11                                |
| <i>hCA</i> XII | Binding mode 1 | -37.77                                 | -47.97                                | 35.11                                    | -44.26                                |
|                | Binding mode 2 | -13.34                                 | -52.91                                | 23.96                                    | -43.51                                |
|                | Binding mode 3 | -13.85                                 | -34.35                                | 20.53                                    | -40.58                                |

As observed for the active set, we point out both the lipophilic ( $\Delta G_{\text{lip}}$ ) and Van der Waals ( $\Delta G_{\text{vdW}}$ ) contributions as the most important for the capsaicin binding of the *hCA* IX. Specifically, compared to the Benzthiazide, which exhibited the best hydrophobic contribution in the binding to *hCA* IX among the reference compounds, capsaicin showed

improved both  $\Delta G_{\text{lip0}}$  and  $\Delta G_{\text{vdW}}$ . Specifically, the best values for these energetic components were observed for the binding mode 2, with  $\Delta G_{\text{lip0}}$  and  $\Delta G_{\text{vdW}}$  equal to -67.63 and -51.92 Kcal/mol. Considering the best thermodynamic complex of capsaicin with the *hCA IX*, the electrostatic contribution, with a value of -34.62 Kcal/mol, appeared significant for the capsaicin binding to *hCA IX*. Conversely, in the active set, this contribution is lowly for most ligands, except for the ellagic acid, which has shown a higher  $\Delta G_{\text{coul}}$  value of 7 Kcal/mol than capsaicin. Furthermore, capsaicin, similar to ellagic acid, has a higher solvation penalty than the other active compounds.

As observed for *hCA IX*, the complex of capsaicin with *hCA XII* showed improved  $\Delta G_{\text{lip0}}$  and  $\Delta G_{\text{vdW}}$  compared to the active set, reconfirming the hydrophobic contribution as the most important one for its binding to these targets. Also, for *hCA XII*, the best values for these energetic components were observed for binding mode 2, with  $\Delta G_{\text{lip0}}$  and  $\Delta G_{\text{vdW}}$  equal to -52.91 and -43.51 Kcal/mol. Regarding the electrostatic component, capsaicin exhibited the  $\Delta G_{\text{coul}}$  best value of about -37.77 Kcal/mol in binding mode 2. Conversely, in the other docking poses, although the  $\Delta G_{\text{coul}}$  is also higher than those exhibited by the active compounds Acetazolamide and Ellagic acid complexed with *hCA XII*, it is advantageous compared to Benzthiazide, Hydroflumethiazide, and Zonisamide, in any case. Finally, the solvation energy shared a similar value in the complexes of capsaicin with both *hCA* isoforms.

**Table S3.** Values of the  $\Delta G_{\text{bind}}$  energy components ( $\Delta G_{\text{coul}}$ ,  $\Delta G_{\text{lip0}}$ ,  $\Delta G_{\text{solvGB}}$ ,  $\Delta G_{\text{vdW}}$ ) related to the complexes of *hCA IX* and *hCA XII* with the known active compounds. The reported values are expressed in Kcal/mol.

|                | Compound           | $\Delta G_{\text{coul}}$<br>(Kcal/mol) | $\Delta G_{\text{lip0}}$<br>(Kcal/mol) | $\Delta G_{\text{solvGB}}$<br>(Kcal/mol) | $\Delta G_{\text{vdW}}$<br>(Kcal/mol) |
|----------------|--------------------|----------------------------------------|----------------------------------------|------------------------------------------|---------------------------------------|
| <i>hCA IX</i>  | Benzthiazide       | -3.15                                  | -31.26                                 | -0.29                                    | -43.74                                |
|                | Hydroflumethiazide | -2.70                                  | -7.73                                  | -7.08                                    | -26.27                                |
|                | Ellagic acid       | -29.11                                 | -19.38                                 | 29.01                                    | -35.75                                |
|                | Zonisamide         | -6.97                                  | -21.82                                 | 12.38                                    | -27.16                                |
| <i>hCA XII</i> | Benzthiazide       | -8.17                                  | -28.75                                 | 3.18                                     | -40.51                                |
|                | Hydroflumethiazide | -3.56                                  | -16.92                                 | -12.38                                   | -28.69                                |
|                | Ellagic acid       | -23.70                                 | -24.64                                 | 13.97                                    | -35.72                                |
|                | Zonisamide         | -10.97                                 | -19.44                                 | 14.15                                    | -27.09                                |
|                | Acetazolamide      | -21.16                                 | -10.48                                 | 14.16                                    | -27.60                                |

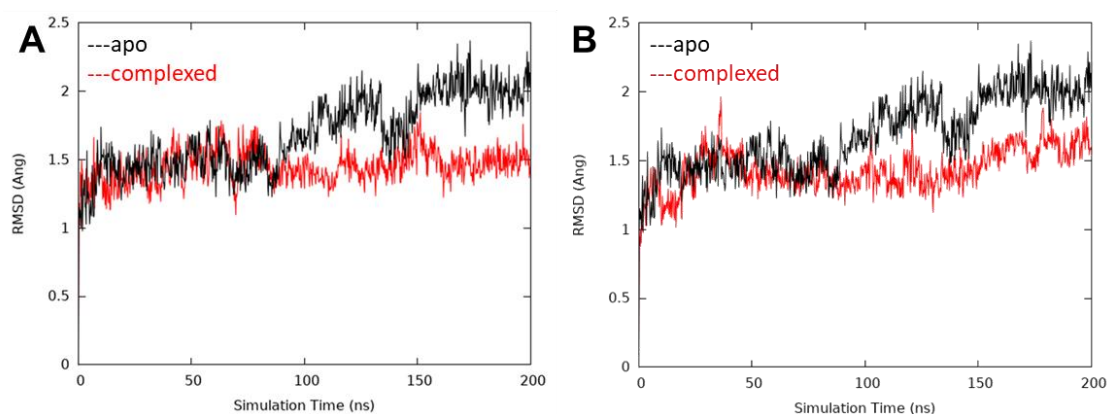

**Figure S1.** Trend of the RMSD value calculated on the C $\alpha$  of **A)** *hCA IX* and **B)** *hCA XII*, in the *apo* form (black line) and in complex with the capsaicin (red line). The RMSD values are reported in Å.

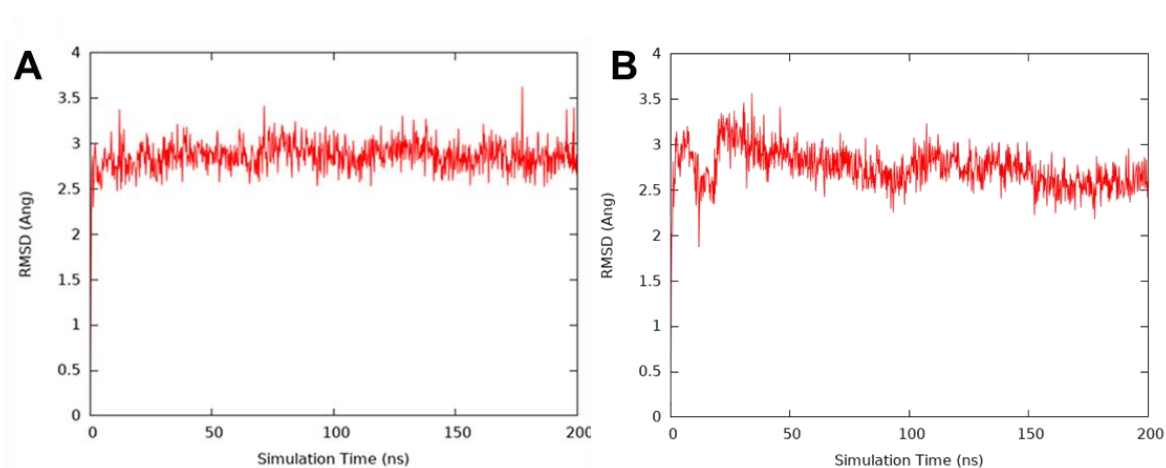

**Figure S2.** RMSD trend of capsaicin complexed with **A)** the *hCA IX* and **B)** the *hCAXII*, during MDs. The RMSD values, reported in Å, are calculated on the heavy atoms of the ligand after the superimposition on the protein.
